# Supplementary material for: COVID-19 subphenotypes at hospital admission are associated with mortality: a cross-sectional study
Source: PubMed Central journal article supplement (PMC10795648; doi:10.1080/07853890.2022.2148733), 2022-11-29
Supplement: IANN_A_2148733_SM5280.pdf [file IANN_A_2148733_SM5280.pdf]

**Table S1.** Admission characteristics including vital signs and lab values by COVID-19 subphenotype

|                                    | Hypoinflamm<br>atory (N =<br>673) | Mod. Inflam,<br>fever (N = 766) | Hyperinflam,<br>liver<br>dysfunction (N<br>= 790) | Mod. Inflam,<br>coagulopathy (N<br>= 953) | Hyperinflam,<br>renal<br>dysfunction (N<br>= 617) | Hyperinflam,<br>multiorgan<br>dysfunction (N =<br>821) | Total (N =<br>4,620) | p-value <sup>a</sup> |
|------------------------------------|-----------------------------------|---------------------------------|---------------------------------------------------|-------------------------------------------|---------------------------------------------------|--------------------------------------------------------|----------------------|----------------------|
| <b>Age (years), N</b>              | 672                               | 766                             | 790                                               | 953                                       | 617                                               | 820                                                    | 4,618                |                      |
| Median (IQR)                       | 51.0 (35.0, 69.0)                 | 59.0 (49.0, 66.0)               | 61.0 (52.0, 68.0)                                 | 77.0 (67.0, 84.0)                         | 70.0 (60.0, 79.0)                                 | 75.5 (65.0, 85.0)                                      | 67.0 (55.0, 78.0)    | < 0.001              |
| <b>Sex, N</b>                      | 673                               | 766                             | 790                                               | 953                                       | 617                                               | 821                                                    | 4,620                |                      |
| Male, n (%)                        | 242 (36.0%)                       | 446 (58.2%)                     | 652 (82.5%)                                       | 439 (46.1%)                               | 363 (58.8%)                                       | 487 (59.3%)                                            | 2,629 (56.9%)        | < 0.001              |
| Female, n (%)                      | 431 (64.0%)                       | 320 (41.8%)                     | 138 (17.5%)                                       | 514 (53.9%)                               | 254 (41.2%)                                       | 334 (40.7%)                                            | 1,991 (43.1%)        |                      |
| <b>Comorbidities, N</b>            | 673                               | 766                             | 790                                               | 953                                       | 617                                               | 821                                                    | 4,620                |                      |
| 0, n (%)                           | 311 (46.2%)                       | 279 (36.4%)                     | 357 (45.2%)                                       | 297 (31.2%)                               | 134 (21.7%)                                       | 337 (41.0%)                                            | 1,715 (37.1%)        | < 0.001              |
| 1, n (%)                           | 234 (34.8%)                       | 332 (43.3%)                     | 308 (39.0%)                                       | 371 (38.9%)                               | 269 (43.6%)                                       | 317 (38.6%)                                            | 1,831 (39.6%)        |                      |
| 2, n (%)                           | 99 (14.7%)                        | 125 (16.3%)                     | 110 (13.9%)                                       | 198 (20.8%)                               | 151 (24.5%)                                       | 131 (16.0%)                                            | 814 (17.6%)          |                      |
| 3, n (%)                           | 27 (4.0%)                         | 29 (3.8%)                       | 15 (1.9%)                                         | 79 (8.3%)                                 | 56 (9.1%)                                         | 32 (3.9%)                                              | 238 (5.2%)           |                      |
| 4, n (%)                           | 2 (0.3%)                          | 1 (0.1%)                        | 0 (0.0%)                                          | 8 (0.8%)                                  | 7 (1.1%)                                          | 4 (0.5%)                                               | 22 (0.5%)            |                      |
| <b>T Max (°F), N</b>               | 673                               | 766                             | 790                                               | 953                                       | 616                                               | 820                                                    | 4,618                |                      |
| Median (IQR)                       | 98.8 (98.3, 99.7)                 | 100.9 (99.7, 102.1)             | 99.9 (98.8, 101.6)                                | 99.2 (98.5, 100.3)                        | 99.1 (98.3, 100.4)                                | 99.0 (98.2, 100.4)                                     | 99.4 (98.5, 100.9)   | < 0.001              |
| <b>O2 Min (%), N</b>               | 670                               | 766                             | 789                                               | 953                                       | 616                                               | 820                                                    | 4,614                |                      |
| Median (IQR)                       | 65 (56, 74)                       | 66 (60, 73)                     | 69 (62, 76)                                       | 61 (55, 68)                               | 62 (54, 70)                                       | 56 (50, 66)                                            | 63 (56, 72)          | < 0.001              |
| <b>HR Max (bpm), N</b>             | 672                               | 766                             | 790                                               | 953                                       | 617                                               | 821                                                    | 4,619                |                      |
| Median (IQR)                       | 98 (85, 109)                      | 103 (94, 111)                   | 106 (96, 118)                                     | 94 (84, 106)                              | 94 (83, 106)                                      | 111 (95, 127)                                          | 100 (89, 114)        | < 0.001              |
| <b>SBP Min (mmHg), N</b>           | 673                               | 766                             | 789                                               | 952                                       | 617                                               | 820                                                    | 4,617                |                      |
| Median (IQR)                       | 114 (102, 129)                    | 114 (105, 125)                  | 118 (107, 129)                                    | 114 (101, 129)                            | 118 (103, 134)                                    | 102 (88, 118)                                          | 114 (101, 127)       | < 0.001              |
| <b>DBP Min (mmHg), N</b>           | 672                               | 764                             | 789                                               | 953                                       | 617                                               | 820                                                    | 4,615                |                      |
| Median (IQR)                       | 65 (56, 74)                       | 66 (60, 73)                     | 69 (62, 76)                                       | 61 (55, 68)                               | 62 (54, 70)                                       | 56 (50, 66)                                            | 63 (56, 72)          | < 0.001              |
| <b>Renal and hepatic markers</b>   |                                   |                                 |                                                   |                                           |                                                   |                                                        |                      |                      |
| <b>ALT (IU/L), N</b>               | 582                               | 740                             | 754                                               | 905                                       | 582                                               | 787                                                    | 4,350                |                      |
| Median (IQR)                       | 20.0 (14.0, 30.0)                 | 35.0 (24.0, 55.0)               | 53.0 (34.0, 82.0)                                 | 21.0 (15.0, 32.0)                         | 17.0 (12.0, 25.0)                                 | 39.0 (25.0, 72.0)                                      | 29.0 (18.0, 50.0)    | < 0.001              |
| <b>AST (IU/L), N</b>               | 554                               | 707                             | 725                                               | 844                                       | 539                                               | 720                                                    | 4,089                |                      |
| Median (IQR)                       | 25.0 (19.0, 33.0)                 | 44.0 (33.0, 62.0)               | 62.0 (45.0, 96.0)                                 | 35.0 (25.0, 51.0)                         | 29.0 (21.0, 41.0)                                 | 73.0 (46.0, 117.0)                                     | 42.0 (28.0, 69.0)    | < 0.001              |
| <b>Albumin (g/dL), N</b>           | 573                               | 743                             | 755                                               | 909                                       | 586                                               | 795                                                    | 4,361                |                      |
| Median (IQR)                       | 3.6 (3.1, 4.0)                    | 3.5 (3.2, 3.7)                  | 3.0 (2.7, 3.3)                                    | 3.0 (2.7, 3.4)                            | 3.2 (2.7, 3.5)                                    | 2.9 (2.5, 3.3)                                         | 3.2 (2.8, 3.5)       | < 0.001              |
| <b>Tbili (mg/dL), N</b>            | 572                               | 744                             | 757                                               | 908                                       | 584                                               | 795                                                    | 4,360                |                      |
| Median (IQR)                       | 0.5 (0.3, 0.7)                    | 0.5 (0.4, 0.7)                  | 0.7 (0.5, 1.0)                                    | 0.6 (0.4, 0.8)                            | 0.5 (0.4, 0.7)                                    | 0.7 (0.5, 1.1)                                         | 0.6 (0.4, 0.8)       | < 0.001              |
| <b>Sodium (mmol/L), N</b>          | 468                               | 691                             | 728                                               | 832                                       | 542                                               | 749                                                    | 4,010                |                      |
| Median (IQR)                       | 138 (136, 140)                    | 136 (133, 138)                  | 135 (133, 138)                                    | 137 (134, 140)                            | 137 (134, 141)                                    | 140 (135, 146)                                         | 137 (134, 140)       | < 0.001              |
| <b>Potassium (mmol/L), N</b>       | 595                               | 736                             | 769                                               | 919                                       | 598                                               | 782                                                    | 4,399                |                      |
| Median (IQR)                       | 4.1 (3.8, 4.4)                    | 4.0 (3.7, 4.4)                  | 4.2 (3.8, 4.6)                                    | 4.2 (3.8, 4.6)                            | 4.7 (4.1, 5.2)                                    | 4.5 (4.0, 5.1)                                         | 4.2 (3.8, 4.7)       | < 0.001              |
| <b>Calcium (mg/dL), N</b>          | 612                               | 764                             | 790                                               | 951                                       | 612                                               | 817                                                    | 4,546                |                      |
| Median (IQR)                       | 8.9 (8.5, 9.3)                    | 8.4 (8.1, 8.7)                  | 8.3 (8.0, 8.7)                                    | 8.3 (7.9, 8.8)                            | 8.3 (7.9, 8.9)                                    | 8.2 (7.8, 8.8)                                         | 8.4 (8.0, 8.8)       | < 0.001              |
| <b>HCO<sub>3</sub> (mmol/L), N</b> | 613                               | 765                             | 790                                               | 951                                       | 612                                               | 816                                                    | 4,547                |                      |
| Median (IQR)                       | 23.4 (21.0, 26.0)                 | 23.9 (21.8, 25.2)               | 23.0 (21.0, 25.0)                                 | 23.2 (21.0, 26.0)                         | 21.0 (17.6, 25.0)                                 | 19.8 (16.3, 22.0)                                      | 22.7 (20.0, 25.0)    | < 0.001              |
| <b>BUN (mg/dL), N</b>              | 621                               | 765                             | 789                                               | 951                                       | 611                                               | 816                                                    | 4,553                |                      |
| Median (IQR)                       | 12.0 (8.0, 16.0)                  | 12.0 (9.0, 15.0)                | 15.0 (12.0, 21.0)                                 | 20.0 (15.0, 27.0)                         | 52.0 (39.0, 71.0)                                 | 46.0 (30.0, 69.0)                                      | 19.0 (12.0, 36.0)    | < 0.001              |
| <b>Creatinine (mg/dL), N</b>       | 622                               | 765                             | 790                                               | 951                                       | 612                                               | 817                                                    | 4,557                |                      |
| Median (IQR)                       | 0.77 (0.63, 0.95)                 | 0.86 (0.70, 1.02)               | 0.90 (0.79, 1.12)                                 | 1.00 (0.80, 1.26)                         | 3.30 (2.18, 6.70)                                 | 1.83 (1.29, 2.99)                                      | 1.05 (0.80, 1.66)    | < 0.001              |
| <b>Anion Gap, N</b>                | 612                               | 765                             | 790                                               | 951                                       | 610                                               | 816                                                    | 4,544                |                      |
| Median (IQR)                       | 10.8 (9.0, 12.2)                  | 11.7 (10.0, 13.0)               | 12.8 (11.0, 14.1)                                 | 11.0 (9.2, 13.0)                          | 14.3 (12.0, 16.8)                                 | 15.1 (13.1, 18.7)                                      | 12.3 (10.3, 14.6)    | < 0.001              |
| <b>Glucose (mg/dL), N</b>          | 614                               | 764                             | 789                                               | 945                                       | 611                                               | 808                                                    | 4,531                |                      |
| Median (IQR)                       | 103.0 (89.0, 126.0)               | 113.0 (102.0, 138.3)            | 122.0 (108.0, 163.0)                              | 119.0 (100.0, 166.0)                      | 122.0 (94.5, 200.5)                               | 150.5 (116.0, 227.0)                                   | 120.0 (101.0, 169.0) | < 0.001              |
| <b>Cardiac markers</b>             |                                   |                                 |                                                   |                                           |                                                   |                                                        |                      |                      |

|                                 |                      |                       |                        |                      |                        |                        |                       |         |
|---------------------------------|----------------------|-----------------------|------------------------|----------------------|------------------------|------------------------|-----------------------|---------|
| <b>Troponin (ng/mL), N</b>      | 480                  | 684                   | 729                    | 860                  | 551                    | 768                    | 4,072                 |         |
| Median (IQR)                    | 0.01 (0.01, 0.01)    | 0.01 (0.01, 0.01)     | 0.01 (0.01, 0.02)      | 0.02 (0.01, 0.05)    | 0.07 (0.03, 0.16)      | 0.11 (0.04, 0.29)      | 0.02 (0.01, 0.07)     | < 0.001 |
| <b>BNP (pg/mL), N</b>           | 242                  | 480                   | 563                    | 646                  | 453                    | 637                    | 3,021                 |         |
| Median (IQR)                    | 25.9 (10.0, 68.6)    | 10.9 (10.0, 23.5)     | 23.0 (10.7, 49.1)      | 103.2 (41.1, 268.7)  | 241.8 (45.6, 1056.7)   | 136.7 (52.8, 348.3)    | 50.3 (16.7, 185.5)    | < 0.001 |
| <b>Hematologic markers</b>      |                      |                       |                        |                      |                        |                        |                       |         |
| <b>WBC (x10E3/uL), N</b>        | 666                  | 764                   | 790                    | 951                  | 616                    | 818                    | 4,605                 |         |
| Median (IQR)                    | 7.0 (5.13, 9.50)     | 5.90 (4.70, 7.35)     | 9.27 (7.30, 11.90)     | 6.90 (5.10, 9.75)    | 7.00 (5.20, 9.95)      | 11.40 (8.53, 15.30)    | 7.70 (5.60, 10.70)    | < 0.001 |
| <b>Hgb (g/dL), N</b>            | 667                  | 765                   | 790                    | 951                  | 616                    | 820                    | 4,609                 |         |
| Median (IQR)                    | 13.0 (11.8, 14.0)    | 13.8 (12.9, 14.9)     | 14.1 (13.1, 15.0)      | 12.1 (10.7, 13.4)    | 11.0 (9.6, 12.6)       | 13.0 (11.2, 14.6)      | 13.0 (11.5, 14.3)     | < 0.001 |
| <b>Platelets (x10E3/uL), N</b>  | 665                  | 763                   | 789                    | 946                  | 613                    | 819                    | 4,595                 |         |
| Median (IQR)                    | 213.0 (169.0, 269.0) | 183.0 (149.0, 233.5)  | 243.0 (190.0, 311.0)   | 197.0 (147.0, 276.0) | 190.0 (141.0, 254.0)   | 222.0 (162.5, 292.5)   | 208.0 (159.0, 274.0)  | < 0.001 |
| <b>Ddimer (ug/mL), N</b>        | 385                  | 583                   | 659                    | 688                  | 423                    | 677                    | 3,415                 |         |
| Median (IQR)                    | 1.190 (0.560, 2.670) | 0.750 (0.525, 1.180)  | 1.590 (1.040, 2.950)   | 1.825 (1.088, 3.235) | 2.120 (1.330, 3.710)   | 3.780 (2.290, 10.570)  | 1.720 (0.910, 3.490)  | < 0.001 |
| <b>Fibrinogen (mg/dL), N</b>    | 248                  | 300                   | 359                    | 407                  | 236                    | 388                    | 1,938                 |         |
| Median (IQR)                    | 452.0 (390.0, 532.0) | 626.0 (543.0, 694.3)  | 777.0 (684.0, 871.0)   | 575.0 (467.5, 668.0) | 569.0 (480.8, 652.8)   | 691.5 (539.3, 817.3)   | 618.0 (496.0, 744.0)  | < 0.001 |
| <b>PT (seconds), N</b>          | 414                  | 411                   | 467                    | 607                  | 387                    | 540                    | 2,826                 |         |
| Median (IQR)                    | 13.4 (12.9, 14.1)    | 13.4 (12.9, 13.9)     | 14.1 (13.5, 14.9)      | 14.5 (13.6, 16.0)    | 14.6 (13.7, 16.1)      | 15.6 (14.3, 17.3)      | 14.1 (13.4, 15.4)     | < 0.001 |
| <b>PTT (seconds), N</b>         | 412                  | 409                   | 455                    | 597                  | 382                    | 533                    | 2,788                 |         |
| Median (IQR)                    | 28.8 (26.8, 31.3)    | 32.1 (29.5, 34.9)     | 32.4 (29.6, 35.7)      | 32.7 (29.1, 37.9)    | 33.0 (29.4, 38.3)      | 33.2 (28.8, 39.1)      | 32.0 (28.7, 36.3)     | < 0.001 |
| <b>Inflammatory markers</b>     |                      |                       |                        |                      |                        |                        |                       |         |
| <b>IL-6 (pg/mL), N</b>          | 166                  | 345                   | 350                    | 363                  | 227                    | 318                    | 1,769                 |         |
| Median (IQR)                    | 16.6 (9.0, 30.7)     | 51.7 (34.5, 79.5)     | 96.3 (54.0, 151.0)     | 66.4 (37.5, 124.0)   | 69.6 (41.2, 119.9)     | 185.5 (82.5, 447.0)    | 70.7 (35.7, 137.8)    | 0.102   |
| <b>IL-1B (pg/mL), N</b>         | 87                   | 203                   | 190                    | 199                  | 151                    | 146                    | 976                   |         |
| Median (IQR)                    | 0.2 (0.2, 0.4)       | 0.4 (0.2, 0.5)        | 0.5 (0.2, 0.8)         | 0.4 (0.2, 0.6)       | 0.6 (0.3, 0.9)         | 0.7 (0.4, 1.3)         | 0.4 (0.2, 0.7)        | < 0.001 |
| <b>Ferritin (ng/mL), N</b>      | 408                  | 626                   | 676                    | 738                  | 463                    | 658                    | 3,569                 |         |
| Median (IQR)                    | 148.0 (56.8, 261.5)  | 632.5 (383.0, 1091.7) | 1341.0 (770.3, 2465.3) | 416.5 (229.0, 766.5) | 1004.0 (430.0, 2376.5) | 1441.5 (685.0, 2756.0) | 724.0 (326.0, 1653.0) | < 0.001 |
| <b>LDH (U/L), N</b>             | 400                  | 596                   | 634                    | 656                  | 395                    | 579                    | 3,260                 |         |
| Median (IQR)                    | 254.5 (214.0, 315.0) | 392.0 (327.0, 467.3)  | 545.0 (458.0, 702.5)   | 369.5 (281.0, 466.5) | 347.0 (282.0, 428.5)   | 651.0 (504.5, 877.0)   | 421.5 (315.0, 573.0)  | < 0.001 |
| <b>CRP (mg/L), N</b>            | 419                  | 630                   | 688                    | 739                  | 452                    | 667                    | 3,595                 |         |
| Median                          | 18.5 (7.6, 40.3)     | 86.1 (53.4, 130.4)    | 191.4 (140.1, 259.9)   | 90.5 (52.1, 157.2)   | 92.5 (45.3, 149.1)     | 205.0 (121.5, 277.1)   | 114.3 (54.0, 198.4)   | < 0.001 |
| <b>ESR (mm/hr), N</b>           | 169                  | 367                   | 422                    | 427                  | 263                    | 418                    | 2,066                 |         |
| Median (IQR)                    | 30.0 (12.0, 50.0)    | 45.0 (29.0, 66.0)     | 69.0 (46.0, 93.0)      | 64.0 (41.0, 90.5)    | 70.0 (45.5, 102.0)     | 73.0 (48.0, 103.0)     | 61.0 (37.0, 88.0)     | < 0.001 |
| <b>Procalcitonin (ng/mL), N</b> | 372                  | 608                   | 666                    | 687                  | 425                    | 627                    | 3,385                 |         |
| Median (IQR)                    | 0.04 (0.02, 0.06)    | 0.09 (0.06, 0.15)     | 0.25 (0.15, 0.58)      | 0.12 (0.07, 0.26)    | 0.57 (0.28, 1.43)      | 1.02 (0.43, 3.28)      | 0.19 (0.08, 0.65)     | < 0.001 |

Clinical and laboratory data from the first 24 hours of the patient's first hospitalization. Comorbidities = number of co-morbidities. T max= Temperature max. O2 min= minimum O2 saturation. HR max= maximum heart rate. SBP min = minimum systolic blood pressure. DBP min = minimum diastolic blood pressure. HCO3 = bicarbonate. BUN = blood urea nitrogen. BNP = brain natriuretic peptide. WBC = white blood cell count. Hgb= hemoglobin. PT = prothrombin time. PTT = partial thromboplastin time. AST = aspartate aminotransferase. ALT = alanine transaminase. T bili = total bilirubin. IL-6 = interleukin 6. IL-1B = interleukin 1B. LDH = lactate dehydrogenase. CRP = c-reactive protein. ESR = erythrocyte sedimentation rate.

a. ANOVA and chi-square tests examined differences across groups.

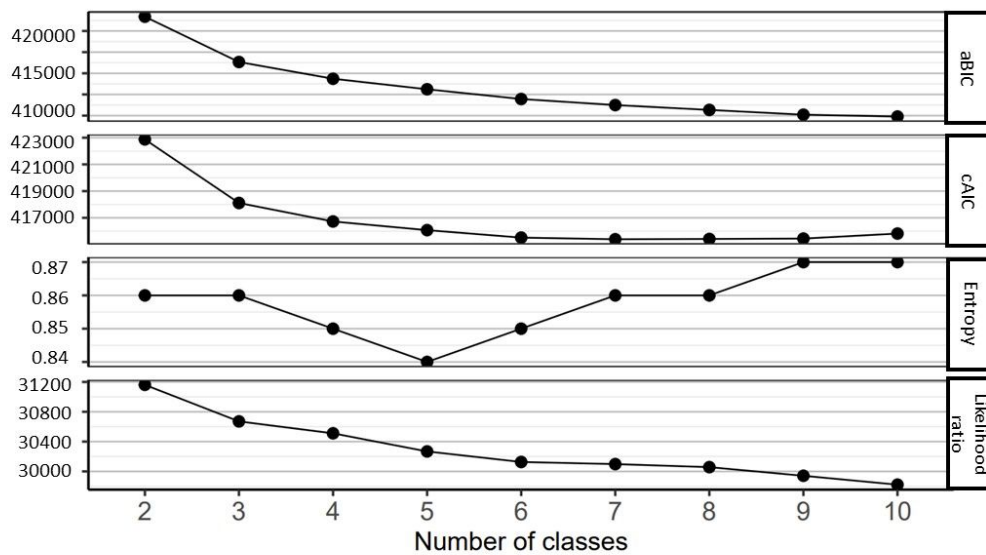

**Figure S1. Latent class analysis (LCA) model fit for models with two through ten subphenotype classes.** aBIC = adjusted Bayesian information criteria. cAIC = consistent Akaike information criteria.

1  
2  
3  
4  
5  
6  
7  
8  
9  
10  
11  
12  
13  
14  
15  
16  
17  
18  
19  
20  
21  
22  
23  
24  
25  
26  
27  
28  
29  
30  
31  
32  
33  
34  
35  
36  
37  
38  
39  
40  
41  
42  
43  
44  
45  
46  
47  
48  
49  
50  
51  
52  
53  
54  
55  
56  
57  
58  
59  
60

|                                           | Bivariate Model<br>(n=4620) |              |       | Multivariable Model<br>(n=4449) |              |       |
|-------------------------------------------|-----------------------------|--------------|-------|---------------------------------|--------------|-------|
|                                           | RR                          | 95% CI       | p     | RR                              | 95% CI       | p     |
| Moderate inflammation, fever              | 3.85                        | 2.42, 6.11   | <0.01 | 3.29                            | 2.05, 5.28   | <0.01 |
| Hyperinflammatory, liver dysfunction      | 7.99                        | 5.16, 12.38  | <0.01 | 6.85                            | 4.37, 10.73  | <0.01 |
| Moderate inflammation, coagulopathy       | 9.35                        | 6.07, 14.41  | <0.01 | 8.09                            | 5.19, 12.61  | <0.01 |
| Hyperinflammatory, renal dysfunction      | 10.23                       | 6.61, 15.83  | <0.01 | 8.78                            | 5.61, 13.75  | <0.01 |
| Hyperinflammatory, multiorgan dysfunction | 21.74                       | 14.23, 33.21 | <0.01 | 17.87                           | 11.56, 27.63 | <0.01 |
| Onset Time                                | -                           | -            | -     | 0.99                            | 0.99, 0.99   | <0.01 |
| MS Brooklyn vs MSH                        | -                           | -            | -     | 1.34                            | 1.19, 1.51   | <0.01 |
| MS Queens vs. MSH                         | -                           | -            | -     | 1.28                            | 1.14, 1.44   | <0.01 |
| Morningside vs. MSH                       | -                           | -            | -     | 1.07                            | 0.94, 1.22   | 0.33  |
| MS West vs. MSH                           | -                           | -            | -     | 0.82                            | 0.68, 0.99   | 0.04  |
| Black vs White                            | -                           | -            | -     | 0.84                            | 0.75, 0.94   | <0.01 |
| Hispanic vs White                         | -                           | -            | -     | 0.91                            | 0.81, 1.03   | 0.13  |
| Asian vs White                            | -                           | -            | -     | 0.98                            | 0.80, 1.19   | 0.81  |
| Other vs White                            | -                           | -            | -     | 1                               | 0.88, 1.14   | 0.95  |
| Medicaid vs. Private/Medicare             | -                           | -            | -     | 0.8                             | 0.71, 0.90   | <0.01 |
| Other Insurance vs Private/Medicare       | -                           | -            | -     | 0.84                            | 0.59, 1.17   | 0.30  |

Robust Poisson regression models to determine risk of mortality per subphenotype as compared to the hypoinflammatory subphenotype. Multivariable model adjusted for time since pandemic onset, race/ethnicity, hospital of presentation, and insurance. MS= Mount Sinai, MSH=Mount Sinai Hospital

1  
2  
3  
4  
5  
6  
7  
8  
9  
10  
11  
12  
13  
14  
15  
16  
17  
18  
19  
20  
21  
22  
23  
24  
25  
26  
27  
28  
29  
30  
31  
32  
33  
34  
35  
36  
37  
38  
39  
40  
41  
42  
43  
44  
45  
46  
47  
48  
49  
50  
51  
52  
53  
54  
55  
56  
57  
58  
59  
60

|                                           | Bivariate Model<br>(n=4620) |             |       | Multivariable Model<br>(n=4449) |             |       |
|-------------------------------------------|-----------------------------|-------------|-------|---------------------------------|-------------|-------|
|                                           | RR                          | 95% CI      | p     | RR                              | 95% CI      | p     |
| Moderate inflammation, fever              | 4.13                        | 2.48, 6.91  | <0.01 | 3.44                            | 2.07, 5.74  | <0.01 |
| Hyperinflammatory, liver dysfunction      | 8.67                        | 5.32, 14.12 | <0.01 | 7.49                            | 4.60, 12.20 | <0.01 |
| Moderate inflammation, coagulopathy       | 5.28                        | 3.21, 8.67  | <0.01 | 4.72                            | 2.87, 7.77  | <0.01 |
| Hyperinflammatory, renal dysfunction      | 3.79                        | 2.23, 6.42  | <0.01 | 3.3                             | 1.95, 5.60  | <0.01 |
| Hyperinflammatory, multiorgan dysfunction | 12.44                       | 7.70, 20.11 | <0.01 | 10.88                           | 6.72, 17.62 | <0.01 |
| Onset Time                                | -                           | -           | -     | 0.99                            | 0.99, 1.00  | <0.01 |
| MS Brooklyn vs MSH                        | -                           | -           | -     | 0.99                            | 0.82, 1.20  | 0.93  |
| MS Queens vs. MSH                         | -                           | -           | -     | 0.75                            | 0.63, 0.91  | <0.01 |
| Morningside vs. MSH                       | -                           | -           | -     | 0.69                            | 0.56, 0.84  | <0.01 |
| MS West vs. MSH                           | -                           | -           | -     | 0.5                             | 0.37, 0.68  | <0.01 |
| Black vs White                            | -                           | -           | -     | 0.99                            | 0.81, 1.21  | 0.90  |
| Hispanic vs White                         | -                           | -           | -     | 1.25                            | 1.02, 1.54  | 0.03  |
| Asian vs White                            | -                           | -           | -     | 1.18                            | 0.85, 1.64  | 0.33  |
| Other vs White                            | -                           | -           | -     | 1.29                            | 1.03, 1.61  | 0.03  |
| Medicaid vs. Private/Medicare             | -                           | -           | -     | 0.96                            | 0.81, 1.14  | 0.63  |
| Other Insurance vs Private/Medicare       | -                           | -           | -     | 0.51                            | 0.26, 1.00  | 0.05  |

Robust Poisson regression models to determine risk of intubation per subphenotype as compared to the hypoinflammatory subphenotype. Multivariable model adjusted for time since pandemic onset, race/ethnicity, hospital of presentation, and insurance. MS= Mount Sinai, MSH=Mount Sinai Hospital

1  
2  
3  
4  
5  
6  
7  
8  
9  
10  
11  
12  
13  
14  
15  
16  
17  
18  
19  
20  
21  
22  
23  
24  
25  
26  
27  
28  
29  
30  
31  
32  
33  
34  
35  
36  
37  
38  
39  
40  
41  
42  
43  
44  
45  
46  
47  
48  
49  
50  
51  
52  
53  
54  
55  
56  
57  
58  
59  
60

|                                           | Bivariate Model<br>(n=4620) |            |       | Multivariable Model<br>(n=4449) |            |       |
|-------------------------------------------|-----------------------------|------------|-------|---------------------------------|------------|-------|
|                                           | RR                          | 95% CI     | p     | RR                              | 95% CI     | p     |
| Moderate inflammation, fever              | 2.01                        | 1.51, 2.68 | <0.01 | 2.00                            | 1.50, 2.67 | <0.01 |
| Hyperinflammatory, liver dysfunction      | 3.26                        | 2.5, 4.26  | <0.01 | 3.31                            | 2.52, 4.34 | <0.01 |
| Moderate inflammation, coagulopathy       | 2.24                        | 1.70, 2.95 | <0.01 | 2.25                            | 1.71, 2.98 | <0.01 |
| Hyperinflammatory, renal dysfunction      | 1.74                        | 1.28, 2.36 | <0.01 | 1.84                            | 1.35, 2.51 | <0.01 |
| Hyperinflammatory, multiorgan dysfunction | 3.77                        | 2.90, 4.90 | <0.01 | 3.94                            | 3.02, 5.15 | <0.01 |
| Onset Time                                | -                           | -          | -     | 1.00                            | 1.00, 1.00 | 0.60  |
| MS Brooklyn vs MSH                        | -                           | -          | -     | 0.78                            | 0.65, 0.93 | <0.01 |
| MS Queens vs. MSH                         | -                           | -          | -     | 0.65                            | 0.55, 0.78 | <0.01 |
| Morningside vs. MSH                       | -                           | -          | -     | 1.01                            | 0.87, 1.18 | 0.86  |
| MS West vs. MSH                           | -                           | -          | -     | 0.98                            | 0.81, 1.18 | 0.83  |
| Black vs White                            | -                           | -          | -     | 1.01                            | 0.85, 1.19 | 0.92  |
| Hispanic vs White                         | -                           | -          | -     | 1.17                            | 0.99, 1.39 | 0.07  |
| Asian vs White                            | -                           | -          | -     | 0.98                            | 0.73, 1.32 | 0.91  |
| Other vs White                            | -                           | -          | -     | 1.17                            | 0.97, 1.42 | 0.10  |
| Medicaid vs. Private/Medicare             | -                           | -          | -     | 1.08                            | 0.94, 1.24 | 0.26  |
| Other Insurance vs Private/Medicare       | -                           | -          | -     | 0.43                            | 0.22, 0.83 | 0.01  |

Robust Poisson regression models to determine risk of ICU admission per subphenotype as compared to the hypoinflammatory subphenotype. Multivariable model adjusted for time since pandemic onset, race/ethnicity, hospital of presentation, and insurance. MS= Mount Sinai, MSH=Mount Sinai Hospital

1  
2  
3  
4  
5  
6  
7  
8  
9  
10  
11  
12  
13  
14  
15  
16  
17  
18  
19  
20  
21  
22  
23  
24  
25  
26  
27  
28  
29  
30  
31  
32  
33  
34  
35  
36  
37  
38  
39  
40  
41  
42  
43  
44  
45  
46  
47  
48  
49  
50  
51  
52  
53  
54  
55  
56  
57  
58  
59  
60

|                                           | Bivariate Model<br>(n=3278) |             |       | Multivariable Model<br>(n=3159) |               |       |
|-------------------------------------------|-----------------------------|-------------|-------|---------------------------------|---------------|-------|
|                                           | RR                          | 95% CI      | p     | RR                              | 95% CI        | p     |
| Moderate inflammation, fever              | 2.99                        | 1.96, 4.03  | <0.01 | 2.95                            | 1.88, 4.01    | <0.01 |
| Hyperinflammatory, liver dysfunction      | 4.55                        | 3.49, 5.62  | <0.01 | 4.91                            | 3.80, 6.02    | <0.01 |
| Moderate inflammation, coagulopathy       | 4.87                        | 3.84, 5.90  | <0.01 | 4.87                            | 3.81, 5.93    | <0.01 |
| Hyperinflammatory, renal dysfunction      | 4.89                        | 3.72, 6.06  | <0.01 | 5.15                            | 3.95, 6.34    | <0.01 |
| Hyperinflammatory, multiorgan dysfunction | 9.80                        | 8.43, 11.17 | <0.01 | 10.19                           | 8.79, 11.58   | <0.01 |
| Onset Time                                |                             |             |       | -0.02                           | -0.03, -0.004 | 0.01  |
| MS Brooklyn vs MSH                        |                             |             |       | -2.37                           | -3.41, -1.33  | <0.01 |
| MS Queens vs. MSH                         |                             |             |       | -4.77                           | -5.77, -3.77  | <0.01 |
| Morningside vs. MSH                       |                             |             |       | -0.66                           | -1.61, 0.29   | 0.17  |
| MS West vs. MSH                           |                             |             |       | -1.09                           | -2.17, -0.01  | 0.05  |
| Black vs White                            |                             |             |       | 0.31                            | -0.64, 1.27   | 0.52  |
| Hispanic vs White                         |                             |             |       | 0.45                            | -0.52, 1.42   | 0.36  |
| Asian vs White                            |                             |             |       | 1.75                            | 0.10, 3.40    | 0.04  |
| Other vs White                            |                             |             |       | 1.02                            | -0.14, 2.17   | 0.08  |
| Medicaid vs. Private/Medicare             |                             |             |       | -0.29                           | -1.08, 0.50   | 0.48  |
| Other Insurance vs Private/Medicare       |                             |             |       | -2.54                           | -4.75, -0.34  | 0.02  |

Robust Poisson regression models to determine risk of intubation per subphenotype as compared to the hypoinflammatory subphenotype. Multivariable model adjusted for time since pandemic onset, race/ethnicity, hospital of presentation, and insurance. MS= Mount Sinai, MSH=Mount Sinai Hospital
